# Supplementary material
Source: Springer Nature journal article supplement (https://www.springermedizin.de/resource/supplementary/12882_2011_286_MOESM2_ESM.pdf/9453648)

## Whole cohort (n = 1,239)

### ASVD hospitalizations (n = 307)

MDRD OR 1.21 (1.10-1.34), P<0.001

CKD-EPI OR 1.22 (1.11-1.35), P<0.001

### ASVD deaths (n = 129)

MDRD 1.16 (1.03-1.36), P=0.016

CKD-EPI OR 1.22 (1.06-1.40), P=0.005

### ASVD events (n = 369)

MDRD OR 1.20 (1.09-1.32), P<0.001

CKD-EPI OR 1.21 (1.11-1.34), P<0.001

## Without previous ASVD (n = 1,089)

### ASVD hospitalizations (n = 232)

MDRD OR 1.17 (1.05-1.31), P=0.004

CKD-EPI OR 1.19 (1.06-1.33), P=0.003

### ASVD deaths (n = 95)

MDRD 1.15 (0.98-1.34), P=0.085

CKD-EPI OR 1.19(1.01-1.40), P=0.033

### ASVD events (n = 279)

MDRD OR 1.16 (1.05-1.29), P=0.004

CKD-EPI OR 1.18 (1.06-1.34), P=0.002

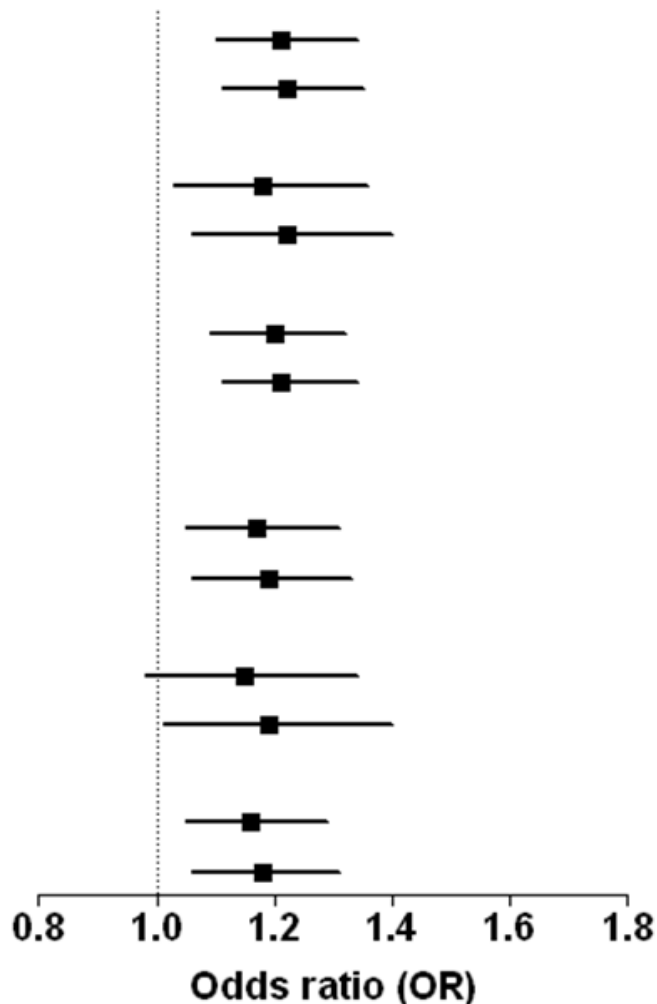

Supplement: MOESM2 [file 9453648]
